# Supplementary material
Source: PubMed Central journal article supplement (PMC4248783)
Supplement: CVI.00598-14_zcd999095110so1.pdf [file CVI.00598-14_zcd999095110so1.pdf]

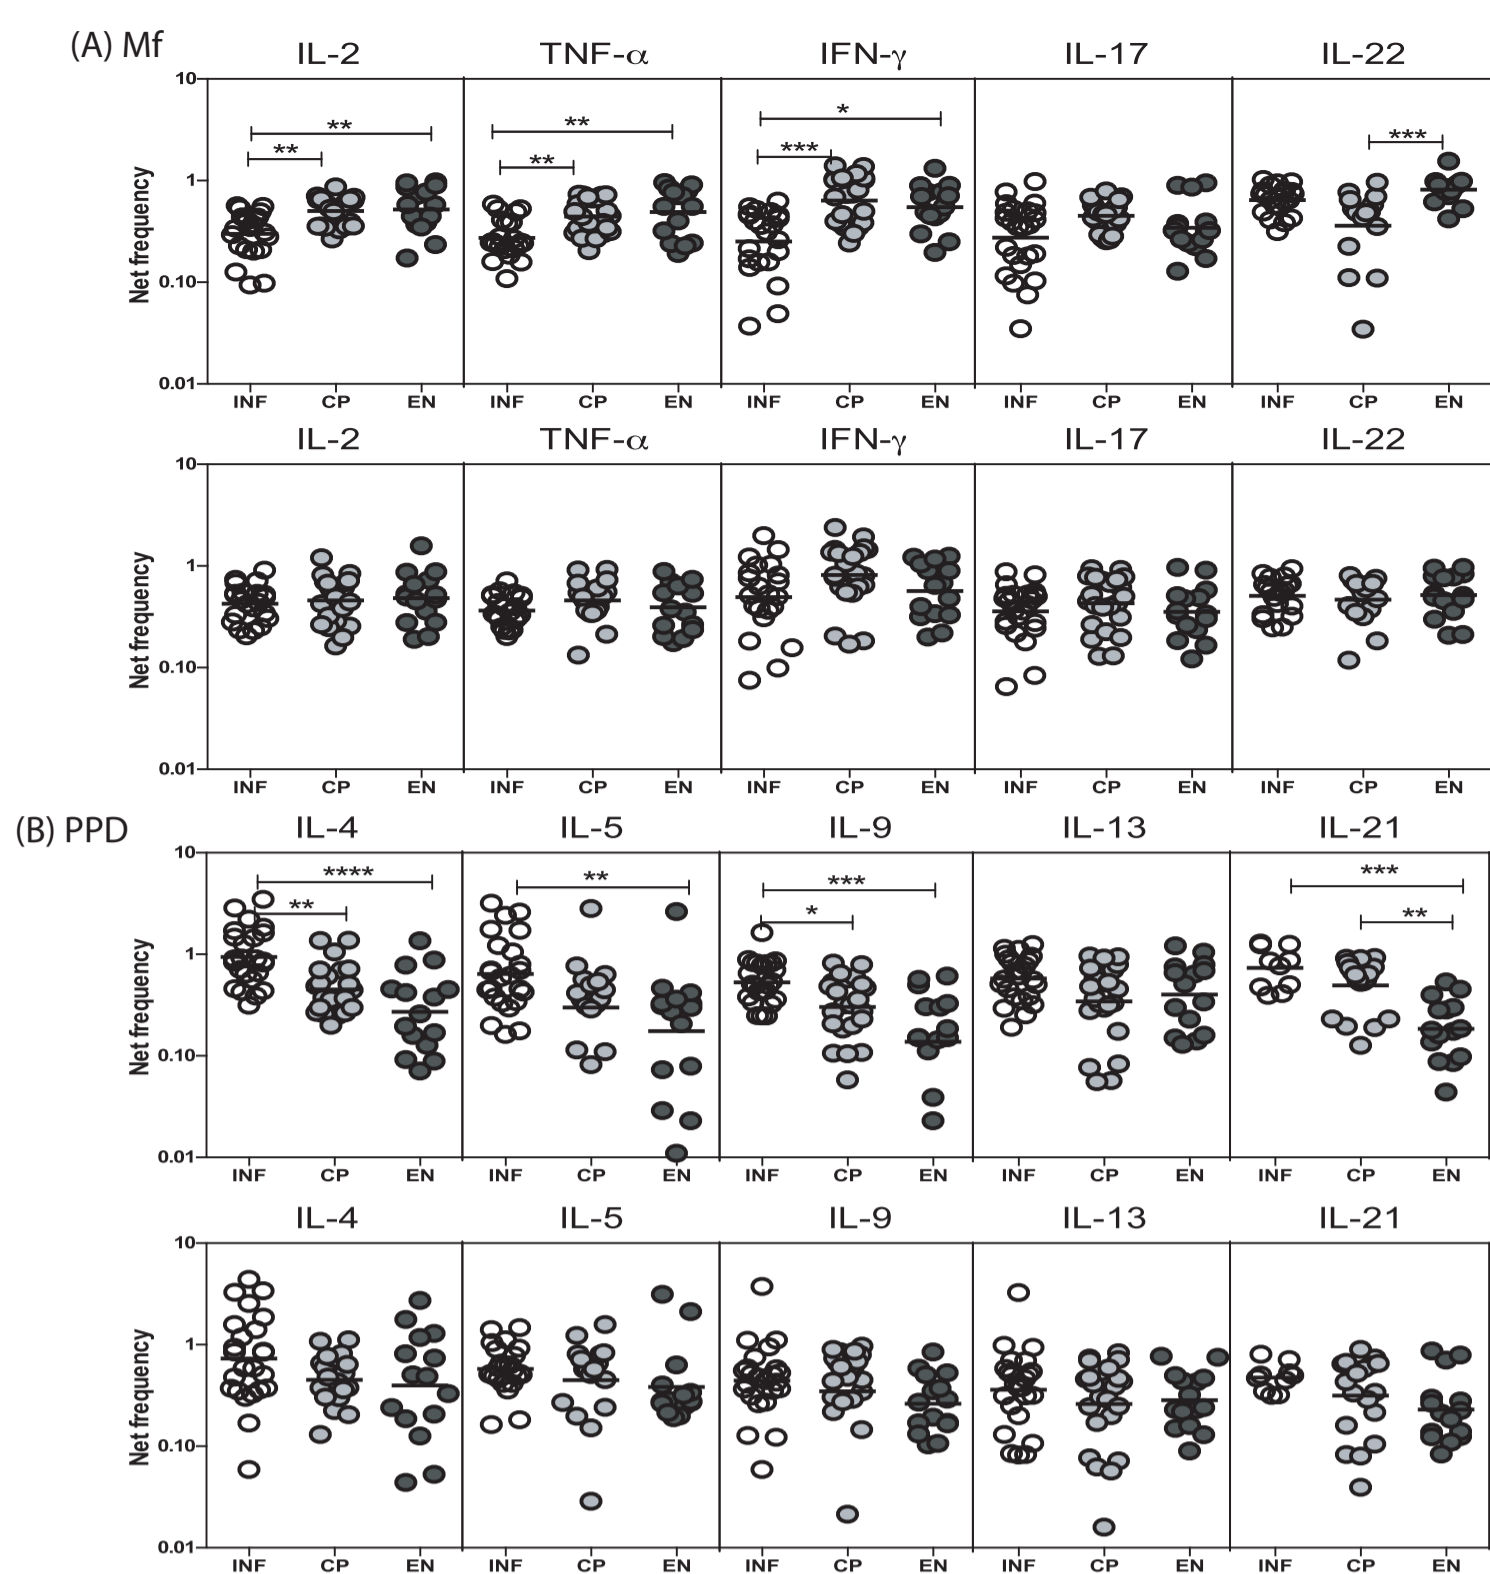

Supplementary Figure 1. Filarial infection is associated with altered filarial antigen - stimulated frequencies of Type 1 and 2 cytokine expressing CD8+ T cells. (A) Mf antigen stimulated frequencies of CD8+ T cells expressing Type 1 and 2 cytokines in INF (n=25), CP (n=23) and EN (n=15) individuals. (D) PPD stimulated frequencies of CD8+ T cells expressing Type 1 and 2 cytokines in INF, CP and EN individuals. The data are depicted as scatter plots with line representing the geometric means. Antigen - stimulated frequencies are shown as net frequencies with the baseline levels subtracted. P values were calculated using the Kruskal-Wallis test with Dunn's multiple comparisons.

Figure -S2 (A) Mf

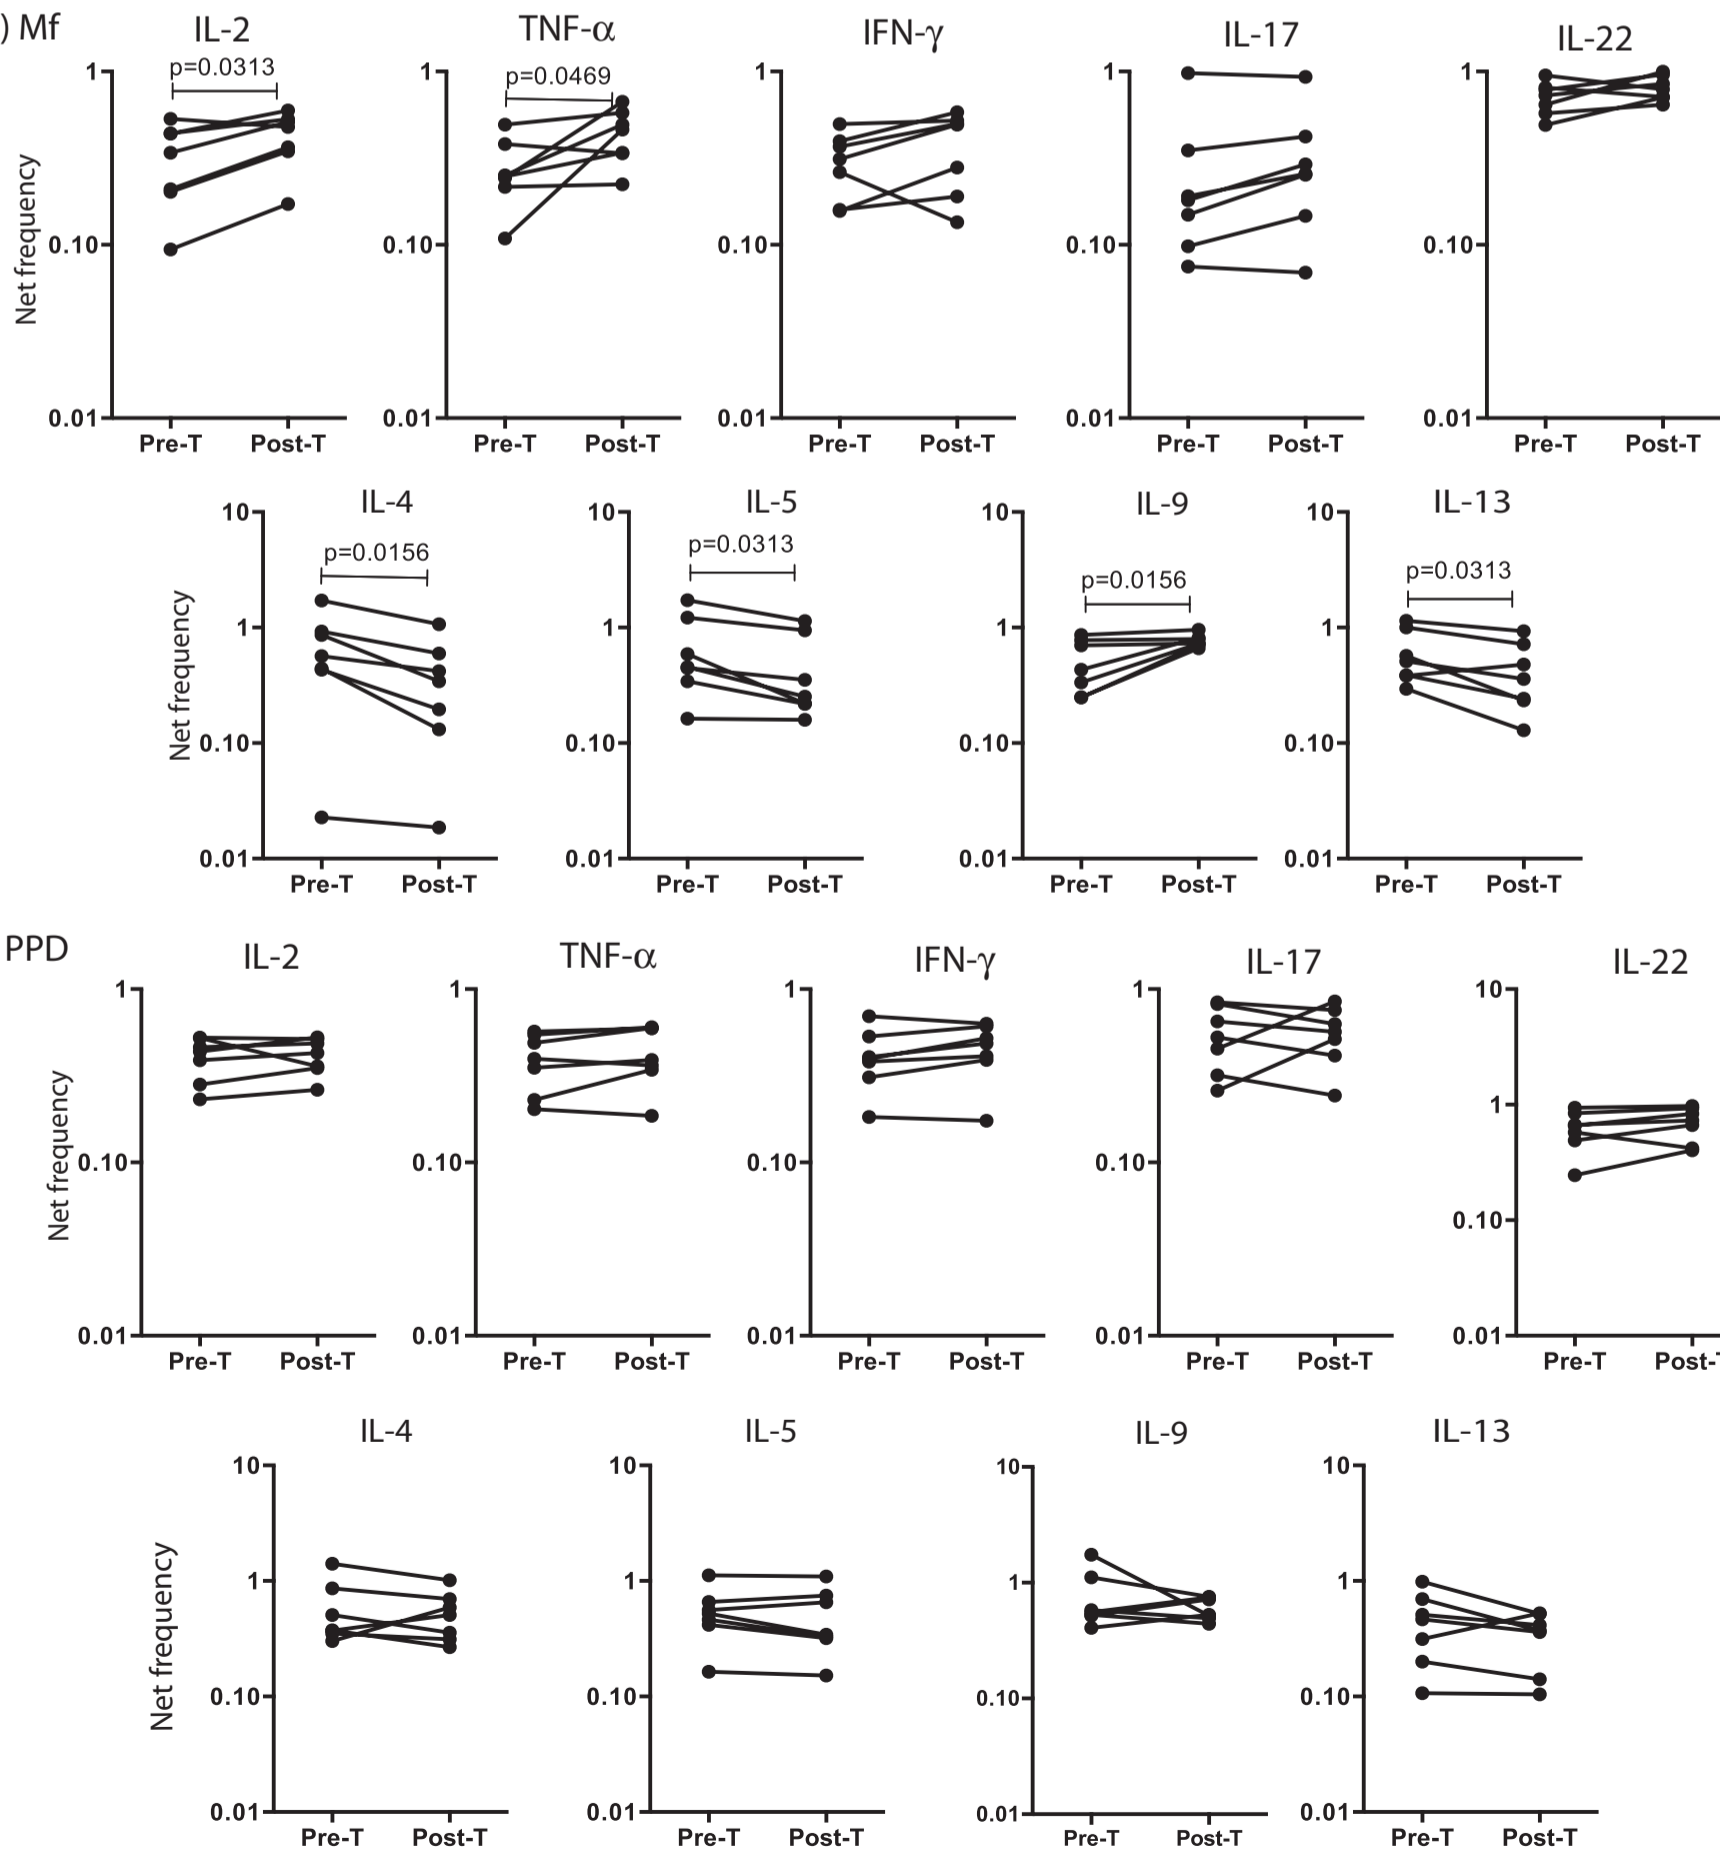

Supplementary Figure 2. Treatment of filarial infection is associated with altered frequencies of filarial antigen - specific CD8+ T cells expressing Type 1 and 2 cytokines. (A) The frequencies of CD8+ T cells expressing Type 1 and 2 cytokines following stimulation with Mf antigen before and after treatment with a standard dose of DEC and albendazole in a subset of INF individuals (n=7). (B) The frequencies of CD8+ T cells expressing Type 1 and 2 cytokines following stimulation with PPD before and after treatment with a standard dose of DEC and albendazole in a subset of INF individuals (n=7). Antigen - stimulated frequencies are shown as net frequencies with the baseline levels subtracted. Each line represents a single individual. P values were calculated using the Wilcoxon signed rank test.
